# Supplementary material for: Distinctive Personality Traits and Neural Correlates Associated with Stimulant Drug Use Versus Familial Risk of Stimulant Dependence
Source: PubMed Central journal article supplement (PMC3705207; doi:10.1016/j.biopsych.2012.11.016), 2013-07-15
Supplement: mmc1.pdf [file mmc1.pdf]

## Distinctive Personality Traits and Neural Correlates Associated with Stimulant Drug Use versus Familial Risk of Stimulant Dependence

### Supplemental Information

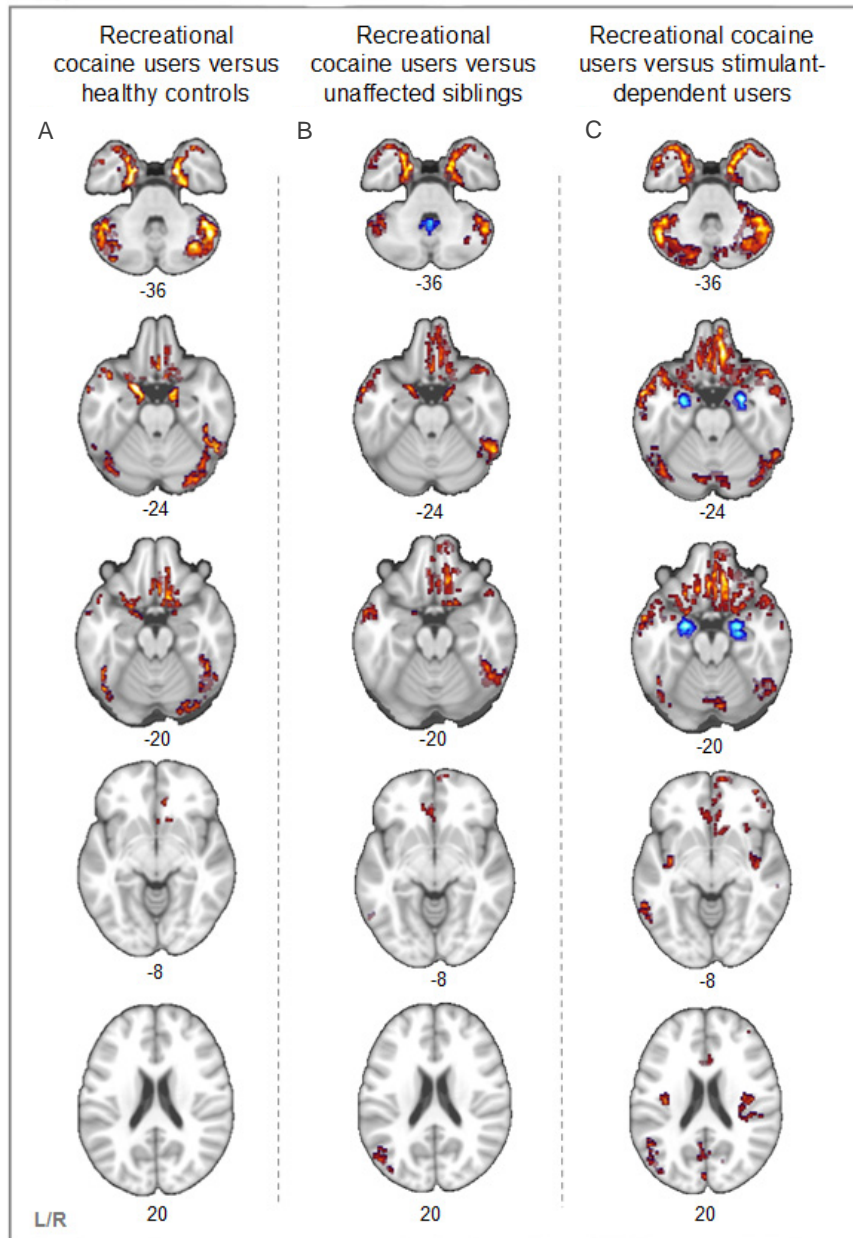

**Figure S1.** Structural abnormalities in (A) recreational cocaine users compared with control volunteers, (B) with the siblings of stimulant-dependent individuals, and (C) with the stimulant-dependent volunteers. Blue voxels indicate a decrease and red voxels indicate an increase in gray matter volume compared with controls.

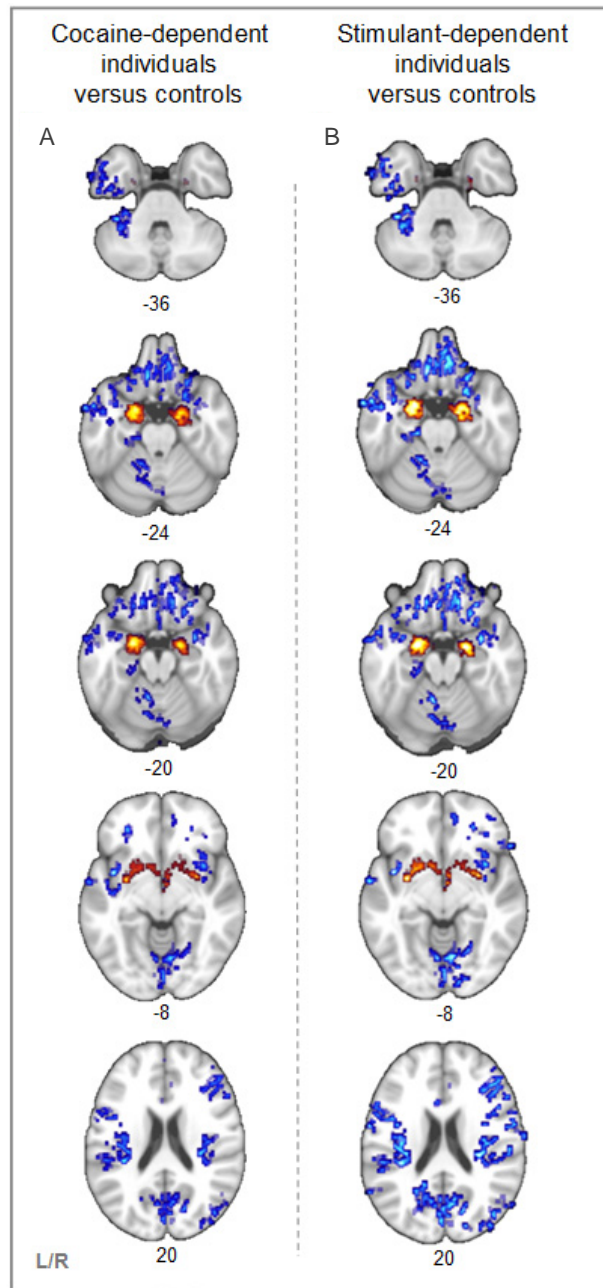

**Figure S2.** (A) All individuals in the sample who were dependent on cocaine were compared with control volunteers. (B) Gray matter volume in all stimulant-dependent individuals, including the three individuals who were dependent on amphetamines, was compared with healthy volunteers.
